# Supplementary material for: Precise synthesis of a rod-coil type miktoarm star copolymer containing poly(n-hexyl isocyanate) and aliphatic polyester
Source: Royal Society of Chemistry journal article supplement (doi:10.1039/c3py00985h), 2013-09-04
Supplement: c3py00985h.pdf [file c3py00985h.pdf]

## Electronic Supplementary Information

### Precise synthesis of rod-coil type miktoarm star copolymer containing poly(*n*-hexyl isocyanate) and aliphatic polyester

Toshifumi Satoh<sup>1,\*</sup>, Naoki Nishikawa<sup>2</sup>, Daisuke Kawato<sup>2</sup>, Daichi Suemasa<sup>2</sup>, Sungmin Jung<sup>3</sup>, Young Yong Kim<sup>3</sup>, Moonhor Ree<sup>3,\*</sup>, and Toyoji Kakuchi<sup>1,\*</sup>

<sup>1</sup>Fucluty of Engineering, Hokkaido University, N13W8, Kita-ku, Sapporo 060-8628, Japan

<sup>2</sup>Graduate School of Chemical Sciences and Engineering, Hokkaido University, N13W8, Kita-ku, Sapporo 060-8628, Japan

<sup>3</sup>Department of Chemistry, Division of Advanced Materials Science, Pohang Accelerator Laboratory, Center for Electro-Photo Behaviors in Advanced Molecular Systems, Polymer Research Institute, and BK School of Molecular Science, Pohang University of Science and Technology (POSTECH), Pohang 790-784, Republic of Korea

Corresponding Authors:

\*E-mail [satoh@poly-bm.eng.hokudai.ac.jp](mailto:satoh@poly-bm.eng.hokudai.ac.jp) (T. Satoh), [ree@postech.ac.kr](mailto:ree@postech.ac.kr) (M. Ree), and [kakuchi@poly-bm.eng.hokudai.ac.jp](mailto:kakuchi@poly-bm.eng.hokudai.ac.jp) (T. Kakuchi).

**Table S1.** Synthesis of PHIC macroinitiators (PHIC-OH, PHIC-(OH)<sub>2</sub>, and PHIC-(OH)<sub>3</sub>) via CuAAC reaction of PHIC-N<sub>3</sub> with ethynyl alcohol derivatives.<sup>a</sup>

| PHIC-N <sub>3</sub>                    |                                                            | PHIC macroinitiators   |                                        |                                                            |
|----------------------------------------|------------------------------------------------------------|------------------------|----------------------------------------|------------------------------------------------------------|
| <i>M</i> <sub>n,NMR</sub> <sup>b</sup> | <i>M</i> <sub>w</sub> / <i>M</i> <sub>n</sub> <sup>c</sup> | Structure              | <i>M</i> <sub>n,NMR</sub> <sup>b</sup> | <i>M</i> <sub>w</sub> / <i>M</i> <sub>n</sub> <sup>c</sup> |
| 3,000                                  | 1.07                                                       | PHIC-OH                | 3,100                                  | 1.07                                                       |
| 5,000                                  | 1.06                                                       |                        | 5,100                                  | 1.06                                                       |
| 10,300                                 | 1.13                                                       |                        | 10,300                                 | 1.13                                                       |
| 11,400                                 | 1.18                                                       |                        | 11,400                                 | 1.19                                                       |
| 3,000                                  | 1.07                                                       | PHIC-(OH) <sub>2</sub> | 3,100                                  | 1.07                                                       |
| 5,000                                  | 1.06                                                       |                        | 5,100                                  | 1.06                                                       |
| 10,900                                 | 1.10                                                       |                        | 10,900                                 | 1.13                                                       |
| 11,300                                 | 1.18                                                       |                        | 11,300                                 | 1.19                                                       |
| 3,000                                  | 1.07                                                       | PHIC-(OH) <sub>3</sub> | 3,200                                  | 1.07                                                       |
| 5,000                                  | 1.07                                                       |                        | 5,200                                  | 1.06                                                       |
| 9,600                                  | 1.16                                                       |                        | 9,600                                  | 1.16                                                       |
| 11,300                                 | 1.19                                                       |                        | 11,300                                 | 1.18                                                       |

<sup>a</sup> Synthesis conditions: solvent, dry THF; catalyst, CuCl, PMDETA; [ethynyl derivatives]/[PHIC-N<sub>3</sub>]/[CuCl]/[PMDETA] = 3.5/1.0/3.0/6.0 ; reaction time, 48 h; temp., r.t. <sup>b</sup> Determined by <sup>1</sup>H NMR spectrum in CDCl<sub>3</sub>. <sup>c</sup> Determined by SEC in THF using PSt standards.

**Table S2.** Solubility of PHIC-*b*-PLLA<sub>1-3</sub>, PHIC-*b*-PCL<sub>1-3</sub>, and homopolymers<sup>a</sup>

| Polymer                           | $M_{n,NMR}^b$<br>( $M_w/M_n^c$ ) | $f_{PHIC}^d$ | CHCl <sub>3</sub> | THF | DMF | Hexane |
|-----------------------------------|----------------------------------|--------------|-------------------|-----|-----|--------|
|                                   |                                  |              |                   |     |     |        |
| PLLA                              | 10,200<br>(1.08)                 | —            | ○                 | ○   | ○   | ×      |
| PCL                               | 10,500<br>(1.04)                 | —            | ○                 | ○   | ○   | ×      |
| PHIC                              | 10,400<br>(1.11)                 | 1.00         | ○                 | ○   | ×   | ○      |
| PHIC- <i>b</i> -PLLA              | 19,200<br>(1.07)                 | 0.59         | ○                 | ○   | ○   | ×      |
| PHIC- <i>b</i> -PLLA <sub>2</sub> | 20,700<br>(1.12)                 | 0.59         | ○                 | ○   | ○   | ×      |
| PHIC- <i>b</i> -PLLA <sub>3</sub> | 19,700<br>(1.08)                 | 0.54         | ○                 | ○   | ○   | ×      |
| PHIC- <i>b</i> -PCL               | 20,900<br>(1.07)                 | 0.53         | ○                 | ○   | ○   | ×      |
| PHIC- <i>b</i> -PCL <sub>2</sub>  | 22,200<br>(1.17)                 | 0.53         | ○                 | ○   | ○   | ×      |
| PHIC- <i>b</i> -PCL <sub>3</sub>  | 20,600<br>(1.09)                 | 0.50         | ○                 | ○   | ○   | ×      |

<sup>a</sup> Conditions: temp., r.t.; concentration, 0.1 (g·L<sup>-1</sup>); ○, soluble; ×, insoluble. <sup>b</sup> Determined by <sup>1</sup>H NMR spectrum in CDCl<sub>3</sub>. <sup>c</sup> Determined by SEC in THF using PSt standards. <sup>d</sup>  $f_{PHIC} = (M_{n,NMR,PHIC} \times d_{PLLA \text{ or } PCL}) / (M_{n,NMR,PHIC} \times d_{PLLA \text{ or } PCL} + M_{n,NMR,PLLA \text{ or } PCL} \times d_{PHIC})$ ,  $d_{PHIC} = 1.0$ ,  $d_{PLLA} = 1.20$ , and  $d_{PCL} = 1.15$ .

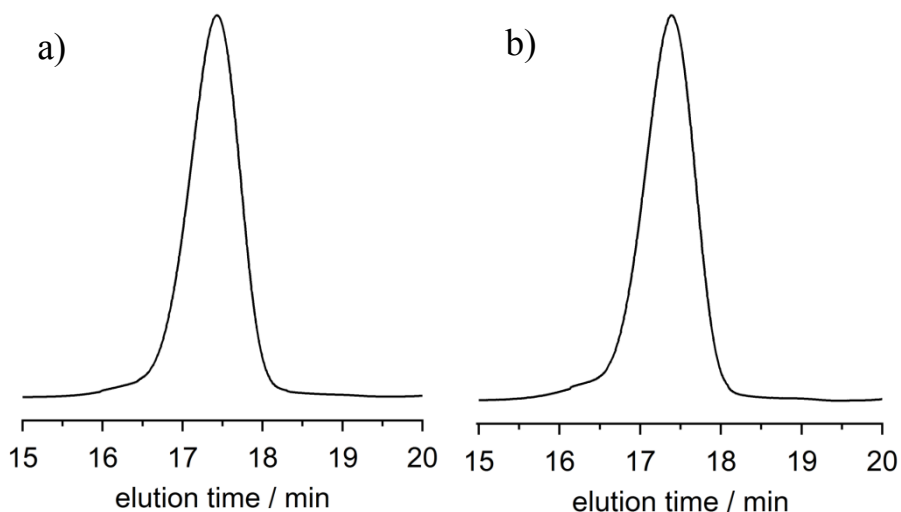

**Figure S1.** SEC traces of PHIC-(OH)<sub>2</sub> (a,  $M_{n,NMR} = 5,100$ ,  $M_{w,SEC} = 6,100$ ,  $M_w/M_n = 1.06$ ) and PHIC-(OH)<sub>3</sub> (b,  $M_{n,NMR} = 5,200$ ,  $M_{w,SEC} = 5,900$ ,  $M_w/M_n = 1.06$ ) (flow rate,  $1.0 \text{ mL} \cdot \text{min}^{-1}$ ; solvent: THF).

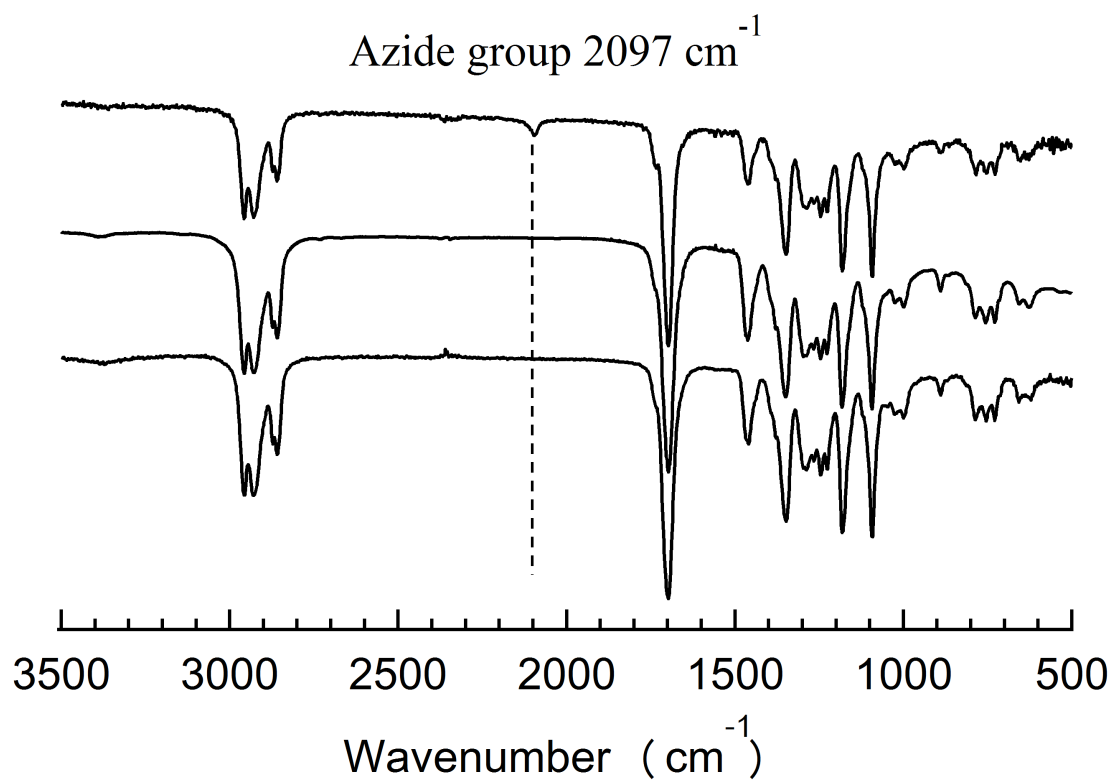

**Figure S2.** FT-IR spectra of PHIC-N<sub>3</sub> (upper), PHIC-(OH)<sub>2</sub> (middle) and PHIC-(OH)<sub>3</sub> (lower).

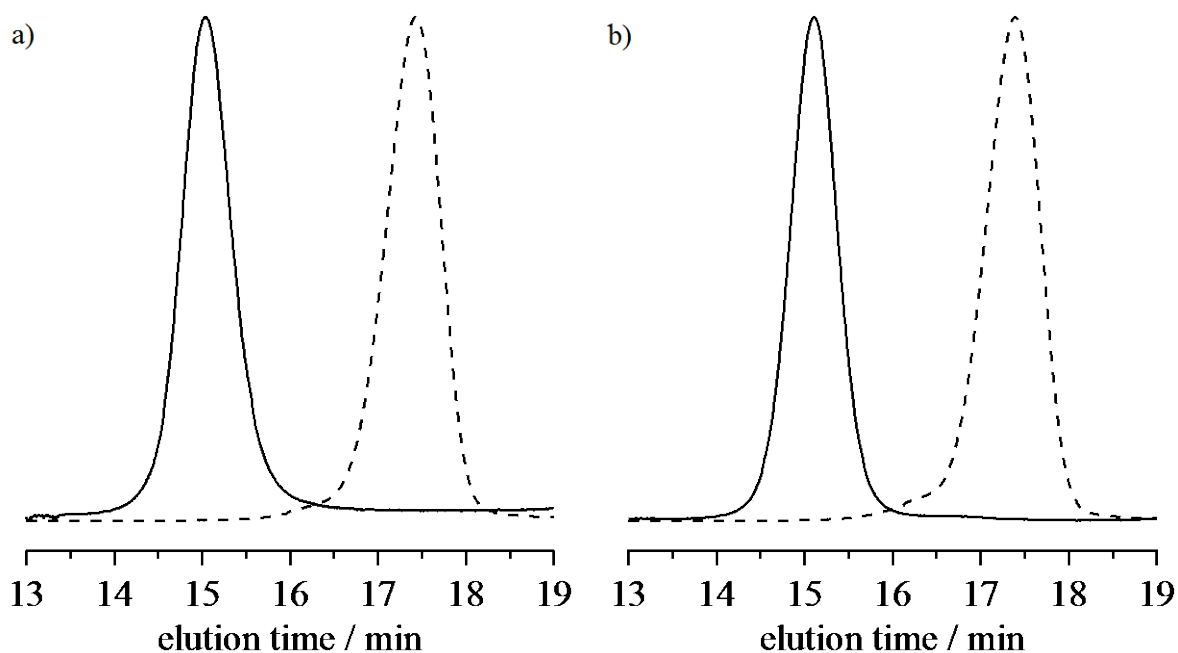

**Figure S3.** SEC traces detected by RI detector (eluent, THF; flow rate,  $1.0 \text{ mL} \cdot \text{min}^{-1}$ ).  
a) PHIC-*b*-PLLA<sub>2</sub> (solid line,  $M_{n,\text{NMR}} = 20,000$ ,  $M_{w,\text{SEC}} = 23,300$ ,  $M_w/M_n = 1.09$ ) and PHIC-(OH)<sub>2</sub> (dashed line,  $M_{n,\text{NMR}} = 5,100$ ,  $M_w/M_n = 1.06$ ), b) PHIC-*b*-PLLA<sub>3</sub> (solid line,  $M_{n,\text{NMR}} = 20,200$ ,  $M_{w,\text{SEC}} = 22,800$ ,  $M_w/M_n = 1.08$ ) and PHIC-(OH)<sub>3</sub> (dashed line,  $M_{n,\text{NMR}} = 5,200$ ,  $M_w/M_n = 1.06$ ).

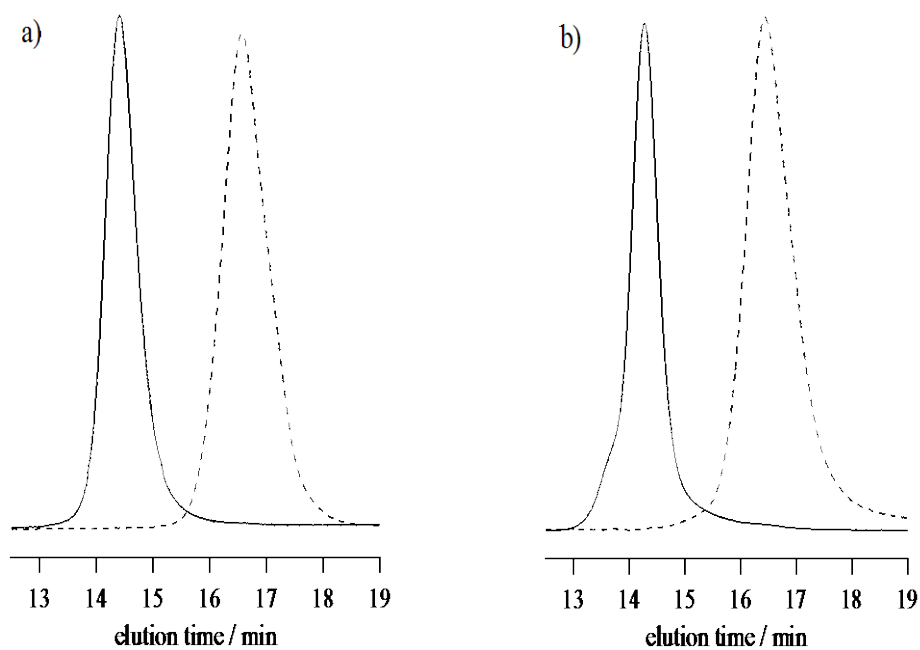

**Figure S4.** SEC traces detected by RI detector (eluent, THF; flow rate,  $1.0 \text{ mL} \cdot \text{min}^{-1}$ ). a) PHIC-*b*-PCL<sub>2</sub> (solid line,  $M_{n,\text{NMR}} = 21,700$ ,  $M_{n,\text{SEC}} = 35,700$ ,  $M_w/M_n = 1.06$ ) and PHIC-(OH)<sub>2</sub> (dashed line,  $M_{n,\text{NMR}} = 5,500$ ,  $M_w/M_n = 1.10$ ), b) PHIC-*b*-PCL<sub>3</sub> (solid line,  $M_{n,\text{NMR}} = 23,600$ ,  $M_{n,\text{SEC}} = 37,600$ ,  $M_w/M_n = 1.09$ ) and PHIC-(OH)<sub>3</sub> (dashed line,  $M_{n,\text{NMR}} = 5,600$ ,  $M_w/M_n = 1.11$ ).

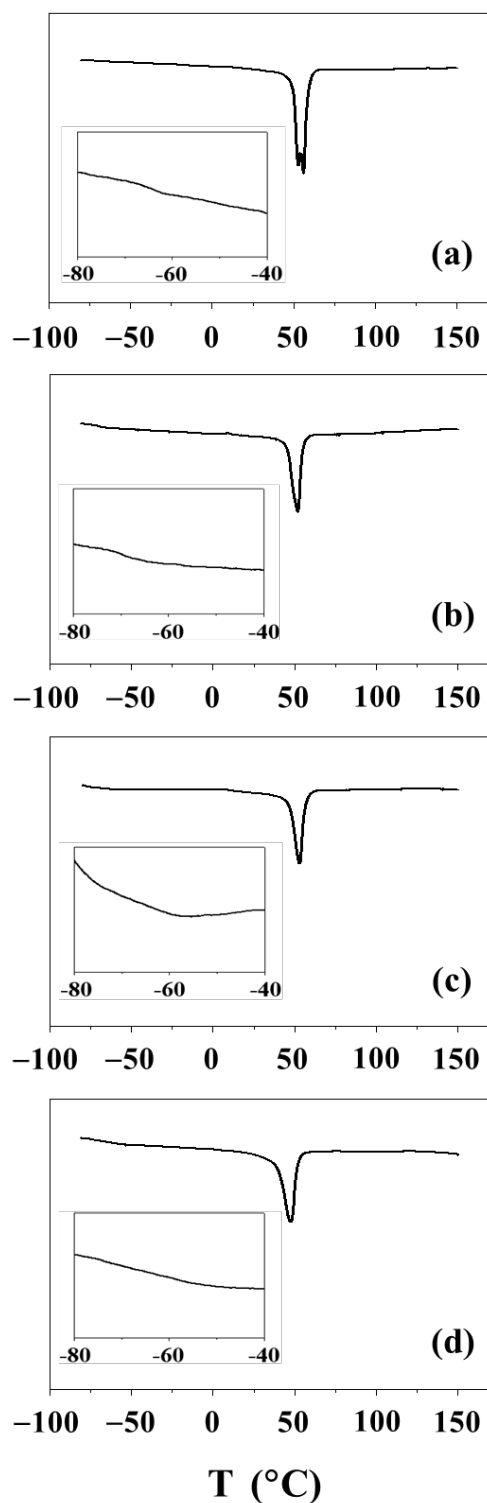

**Figure S5.** DSC results of PCL and PHIC-*b*-PCL<sub>1-3</sub>, which were measured during heating run with a rate of 10.0 °C min<sup>-1</sup> after quenched to -100 °C from the melt: (a) PCL ( $M_n = 10,000$ ); (b) PHIC-*b*-PCL ( $M_{n,NMR} = 22,200$ ,  $M_w/M_n = 1.17$ ,  $f_{PHIC} = 0.55$ ); (c) PHIC-*b*-PCL<sub>2</sub> ( $M_{n,NMR} = 23,000$ ,  $M_w/M_n = 1.12$ ,  $f_{PHIC} = 0.53$ ); (d) PHIC-*b*-PCL<sub>3</sub> ( $M_{n,NMR} = 22,200$ ,  $M_w/M_n = 1.14$ ,  $f_{PHIC} = 0.54$ ).



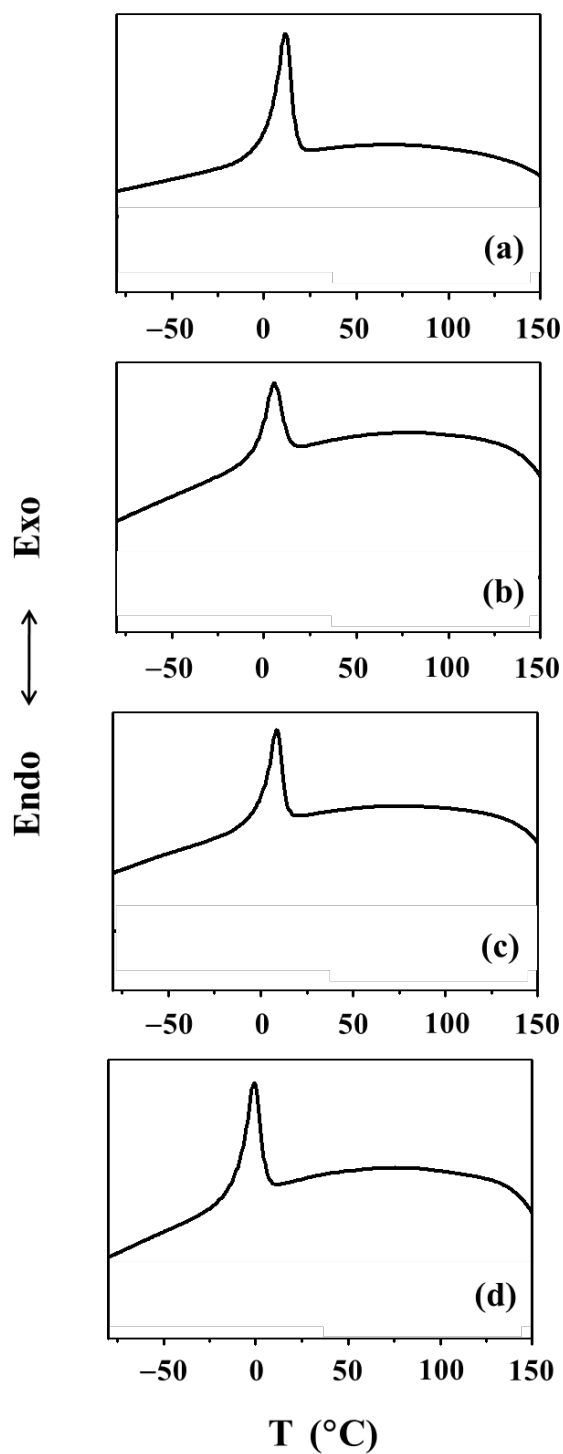

**Figure S6.** DSC results of PCL and PHIC-*b*-PCL<sub>1-3</sub>, which were measured during quenching from the melts: (a) PCL ( $M_n = 10,000$ ); (b) PHIC-*b*-PCL ( $M_{n,NMR} = 22,200$ ,  $M_w/M_n = 1.17$ ,  $f_{PHIC} = 0.55$ ); (c) PHIC-*b*-PCL<sub>2</sub> ( $M_{n,NMR} = 23,000$ ,  $M_w/M_n = 1.12$ ,  $f_{PHIC} = 0.53$ ); (d) PHIC-*b*-PCL<sub>3</sub> ( $M_{n,NMR} = 22,200$ ,  $M_w/M_n = 1.14$ ,  $f_{PHIC} = 0.54$ ).
